# Supplementary material for: Reactions of nitroxides 15. Cinnamates bearing a nitroxyl moiety synthesized using a Mizoroki–Heck cross-coupling reaction
Source: PubMed Central journal article supplement (PMC4505299; doi:10.3762/bjoc.11.130), 2015-07-13
Supplement: Beilstein_J_Org_Chem-11-1155-s001.pdf [file Beilstein_J_Org_Chem-11-1155-s001.pdf]

## Supporting Information

for

# Reactions of nitroxides 15. Cinnamates bearing a nitroxyl moiety synthesized using a Mizoroki–Heck cross-coupling reaction

Jerzy Zakrzewski\*, Bogumiła Huras

Address: Institute of Industrial Organic Chemistry, Annopol 6, 03-236 Warsaw,  
Poland

Email: Jerzy Zakrzewski\* - zakrzewski@ipo.waw.pl

**EIMS, ESIMS,  $^1\text{H}$  NMR,  $^{13}\text{C}$  NMR, and IR spectra of 3 and 5a–5i.**

# EIMS, ESIMS, <sup>1</sup>H NMR, <sup>13</sup>C NMR, and IR spectra of **3** and 5a–5i.

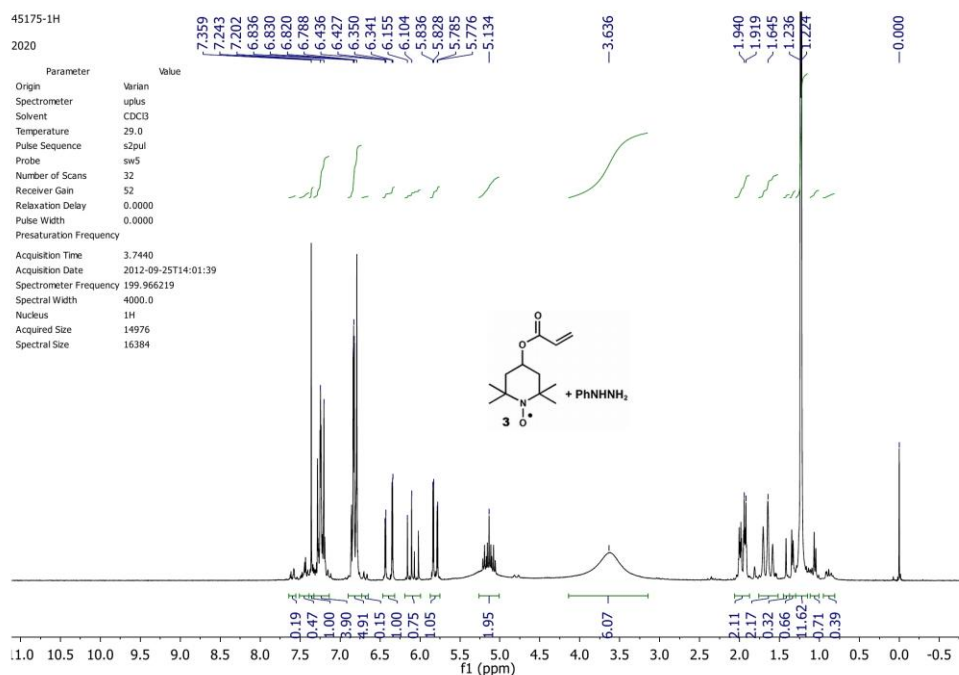

Fig. S1. 4-Acryloyloxy-2,2,6,6-tetramethylpiperidine-1-oxyl (**3**) + C<sub>6</sub>H<sub>5</sub>NHNH<sub>2</sub>, <sup>1</sup>H NMR

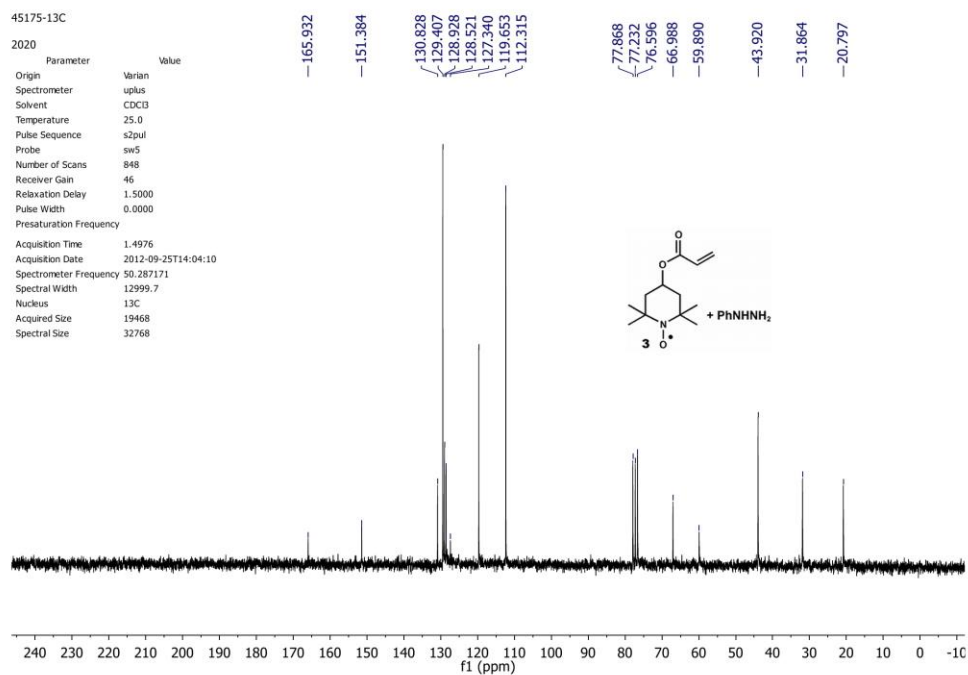

Fig. S2. 4-Acryloyloxy-2,2,6,6-tetramethylpiperidine-1-oxyl (**3**) + C<sub>6</sub>H<sub>5</sub>NHNH<sub>2</sub>, <sup>13</sup>C NMR

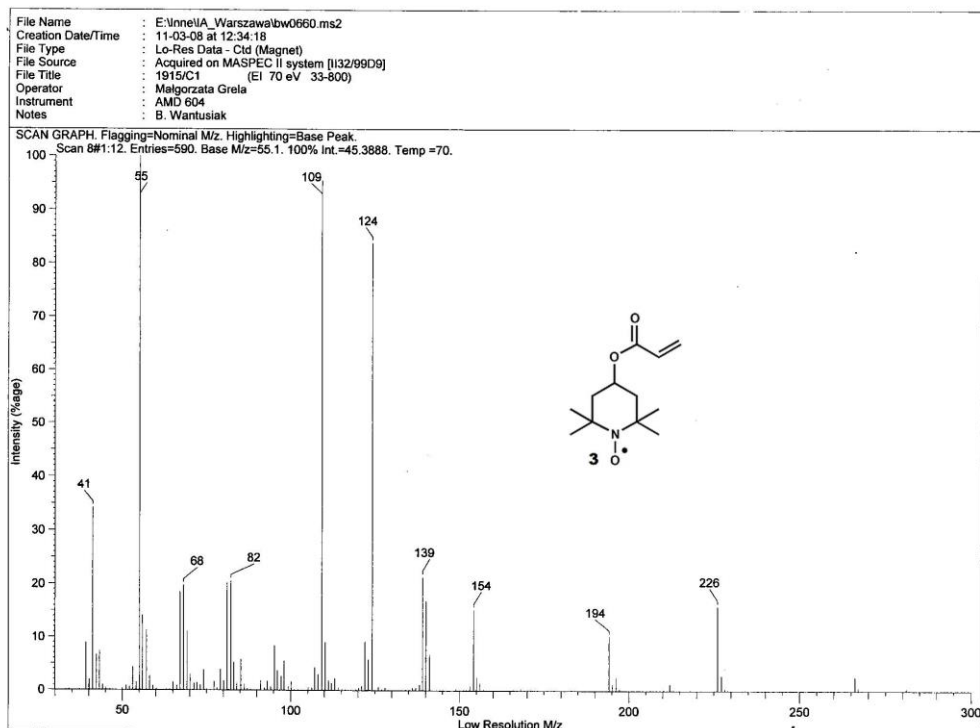

Fig. S3. 4-Acryloyloxy-2,2,6,6-tetramethylpiperidine-1-oxyl (3), EI MS

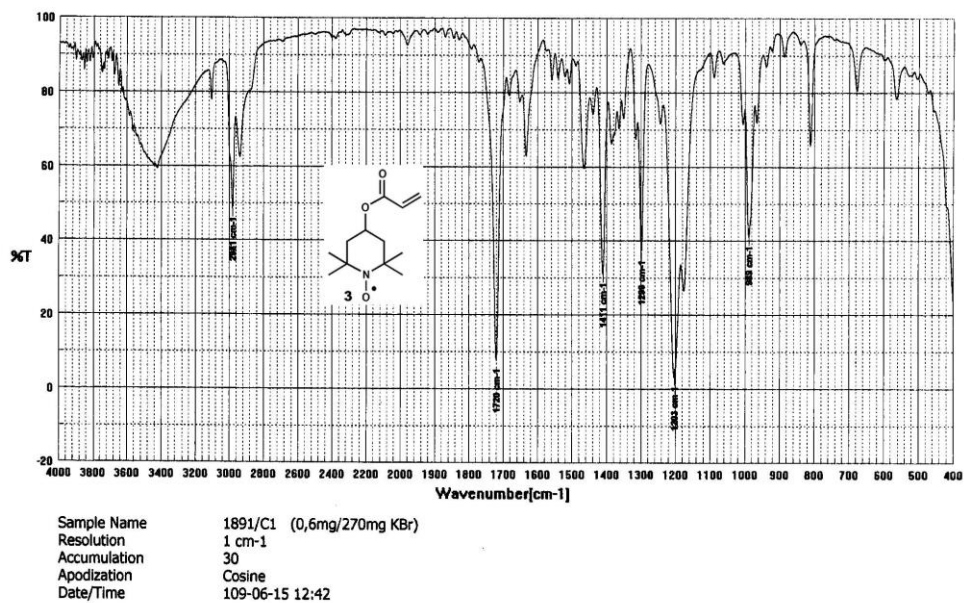

Fig. S4. 4-Acryloyloxy-2,2,6,6-tetramethylpiperidine-1-oxyl (3), IR

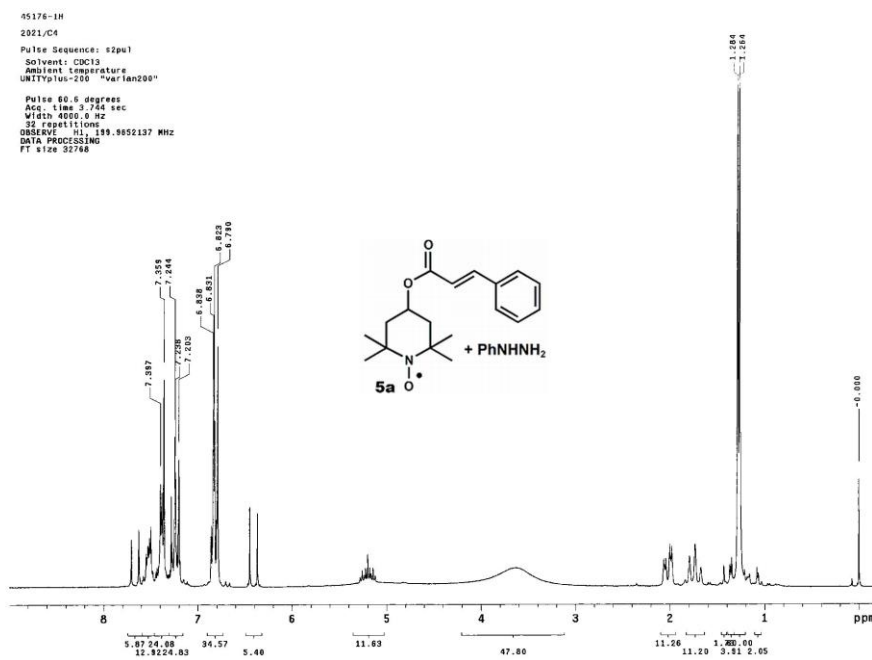

Fig. S5. 2,2,6,6-Tetramethyl-1-oxyl-4-piperidyl 3-*E*-phenylacrylate (**5a**) + C<sub>6</sub>H<sub>5</sub>NHNH<sub>2</sub>, <sup>1</sup>H NMR

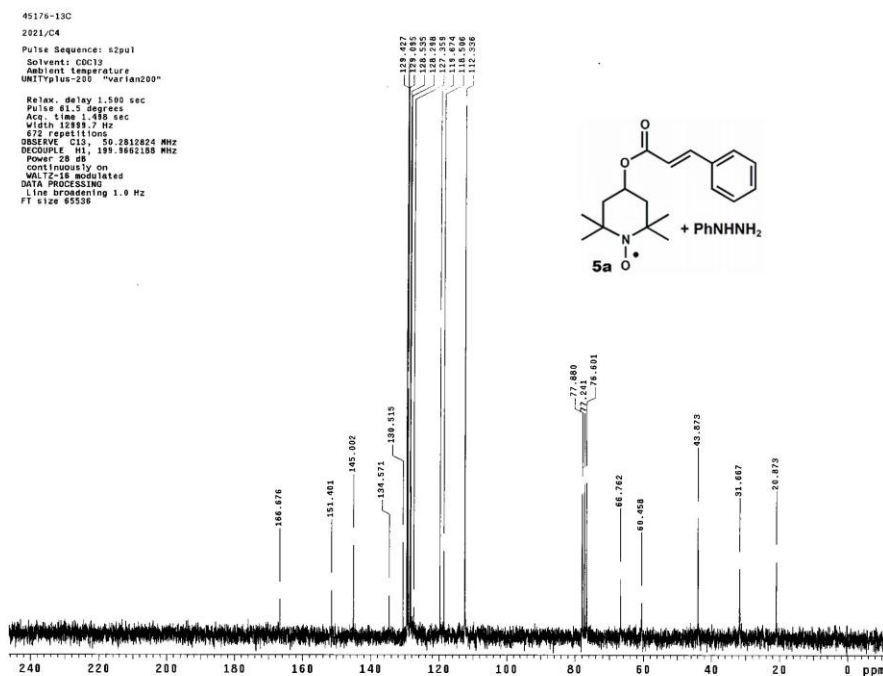

Fig. S6. 2,2,6,6-Tetramethyl-1-oxyl-4-piperidyl 3-*E*-phenylacrylate (**5a**) + C<sub>6</sub>H<sub>5</sub>NHNH<sub>2</sub>, <sup>13</sup>C NMR

File :C:\msdchem\1\data\lipiec2012\BS\JZ\_2021\_C4.D  
 Operator : A. Kielczewska  
 Acquired : 13 Jul 2012 9:44 using AcqMethod DI250.m  
 Instrument : SIS\_DIP-5975B  
 Sample Name: 2021/C4  
 Misc Info :  
 Vial Number: 1

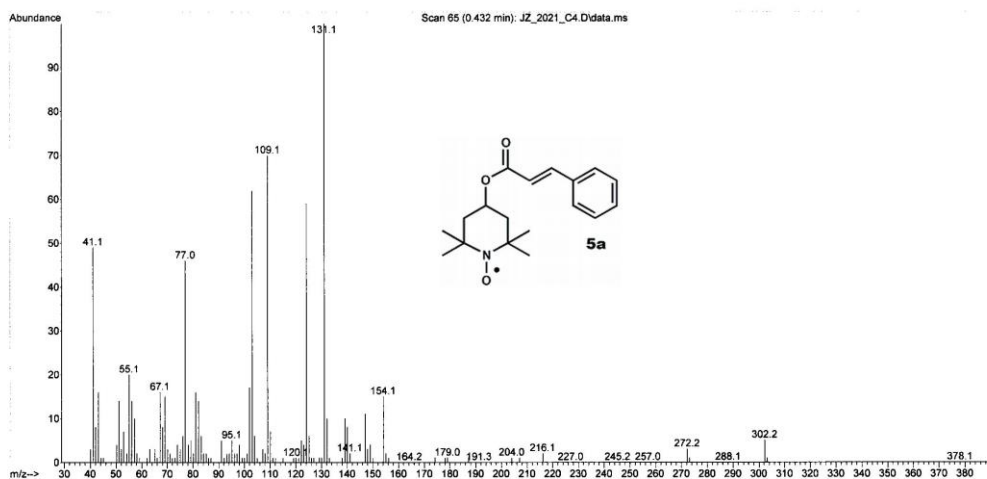

Fig. S7. 2,2,6,6-Tetramethyl-1-oxyl-4-piperidyl 3-*E*-phenylacrylate (**5a**), EI MS

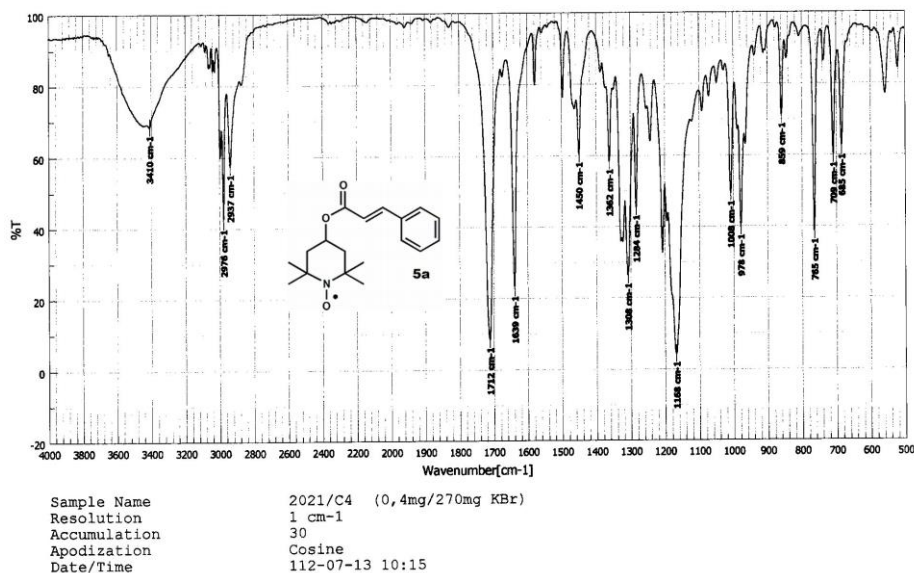

Fig. S8. 2,2,6,6-Tetramethyl-1-oxyl-4-piperidyl 3-*E*-phenylacrylate (**5a**), IR

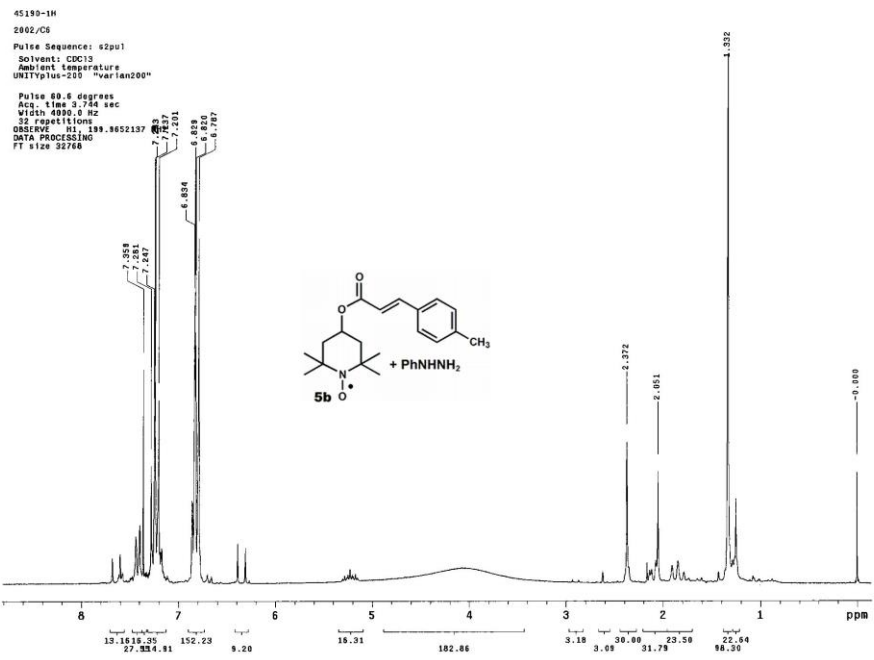

Fig. S9. 2,2,6,6-Tetramethyl-1-oxyl-4-piperidyl 3-*E*-(4-methylphenyl)acrylate (**5b**) + C<sub>6</sub>H<sub>5</sub>NHNH<sub>2</sub>, <sup>1</sup>H NMR

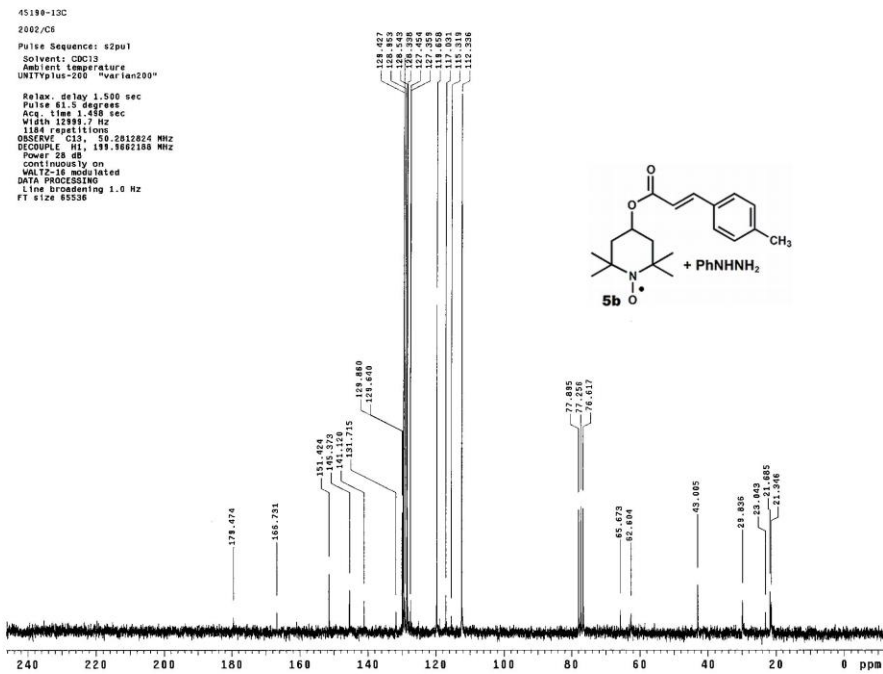

Fig. S10. 2,2,6,6-Tetramethyl-1-oxyl-4-piperidyl 3-*E*-(4-methylphenyl)acrylate (**5b**) + C<sub>6</sub>H<sub>5</sub>NHNH<sub>2</sub>, <sup>13</sup>C NMR

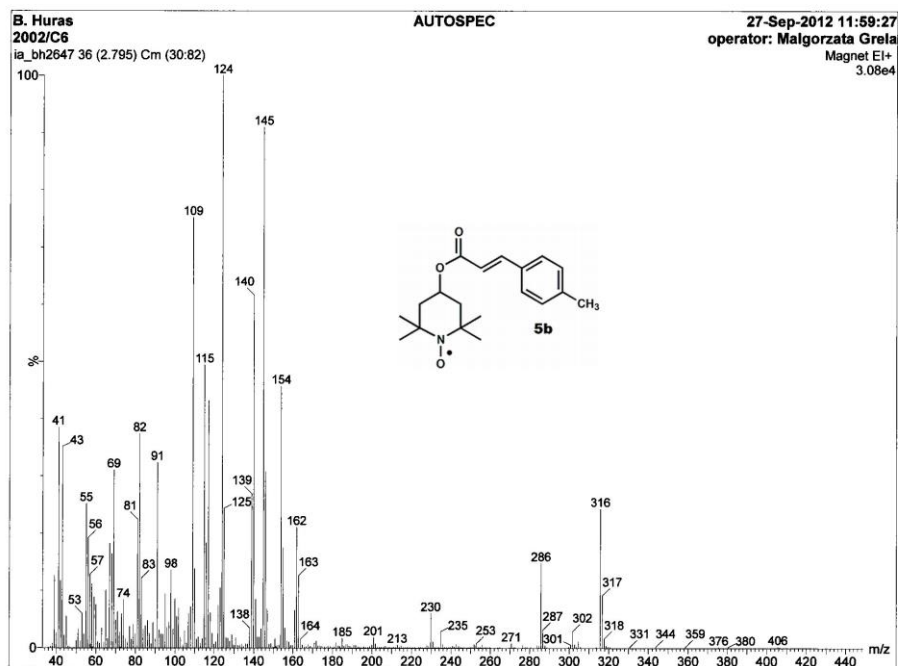

Fig. S11. 2,2,6,6-Tetramethyl-1-oxyl-4-piperidyl 3-*E*-(4-methylphenyl)acrylate (**5b**), EI MS

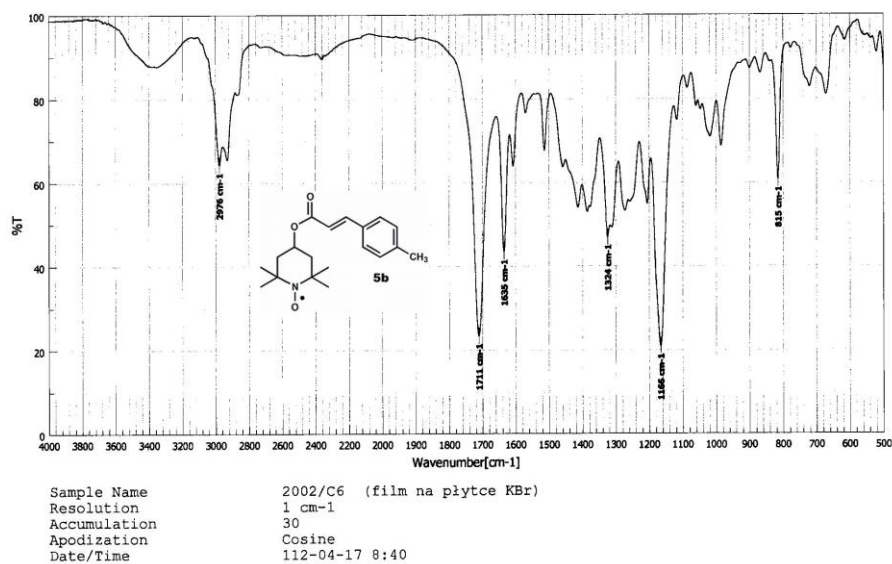

Fig. S12. 2,2,6,6-Tetramethyl-1-oxyl-4-piperidyl 3-*E*-(4-methylphenyl)acrylate (**5b**), IR

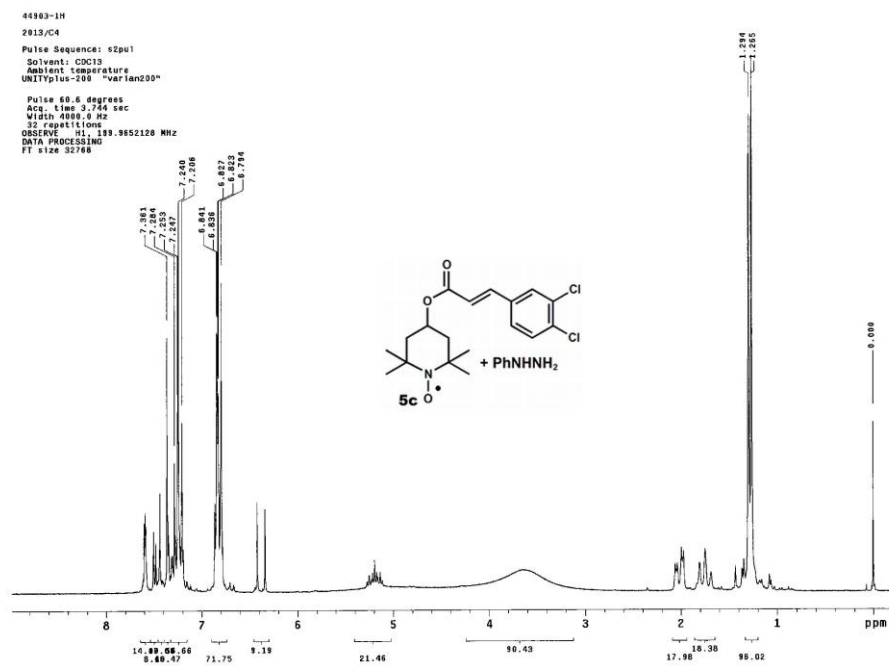

Fig. S13. 2,2,6,6-Tetramethyl-1-oxyl-4-piperidyl 3-*E*-(3,4-dichlorophenyl)acrylate (**5c**) + C<sub>6</sub>H<sub>5</sub>NHNH<sub>2</sub>, <sup>1</sup>H NMR

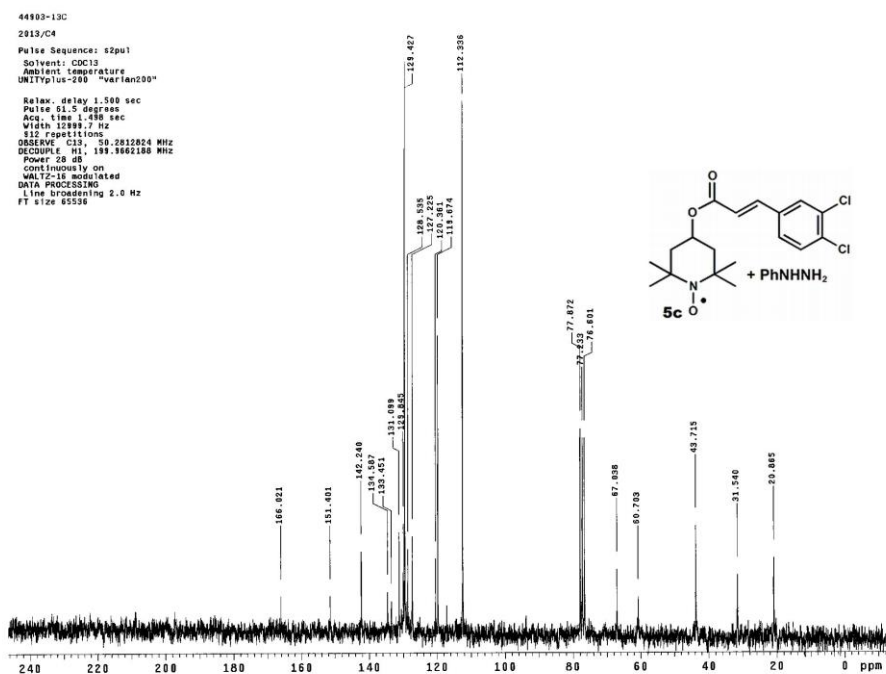

Fig. S14. 2,2,6,6-Tetramethyl-1-oxyl-4-piperidyl 3-*E*-(3,4-dichlorophenyl)acrylate (**5c**) + C<sub>6</sub>H<sub>5</sub>NHNH<sub>2</sub>, <sup>13</sup>C NMR



File : C:\msdchem\1\data\lczwierc 2012\BSJZ\_2013\_C4\_D  
 Operator : A. Kielczewska  
 Acquired : 25 Jun 2012 12:28 using AcqMethod DI250.m  
 Instrument : SIS\_DIP-5975B  
 Sample Name: 2013/C4  
 Misc Info :  
 Vial Number: 1

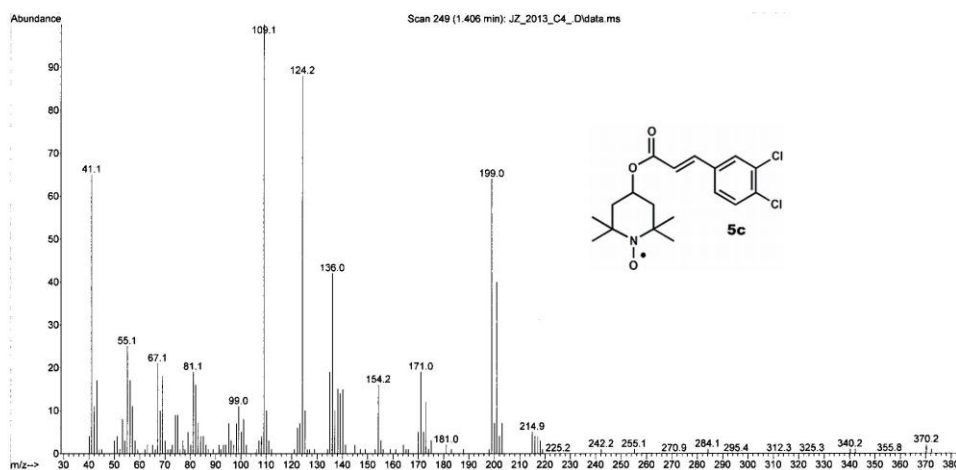

Fig. S15. 2,2,6,6-Tetramethyl-1-oxyl-4-piperidyl 3-*E*-(3,4-dichlorophenyl)acrylate (**5c**), EI MS

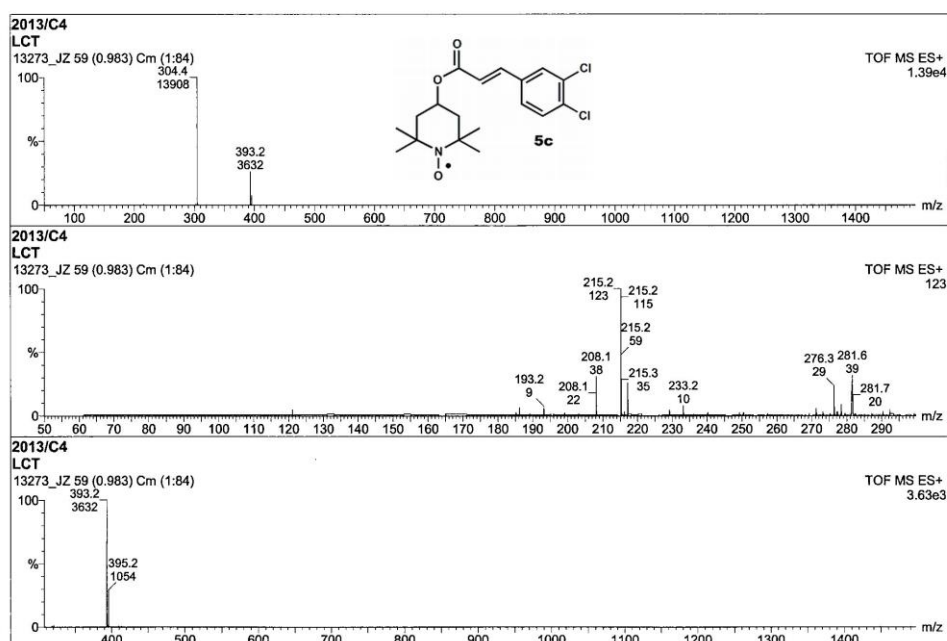

Fig. S16. 2,2,6,6-Tetramethyl-1-oxyl-4-piperidyl 3-*E*-(3,4-dichlorophenyl)acrylate (**5c**), ESI MS

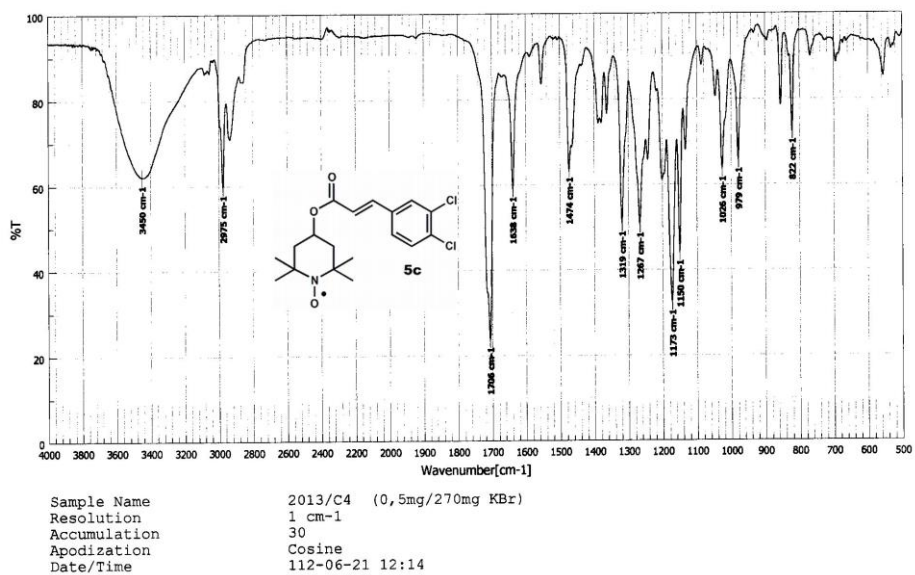

Fig. S17. 2,2,6,6-Tetramethyl-1-oxyl-4-piperidyl 3-E-(3,4-dichlorophenyl)acrylate (**5c**), IR

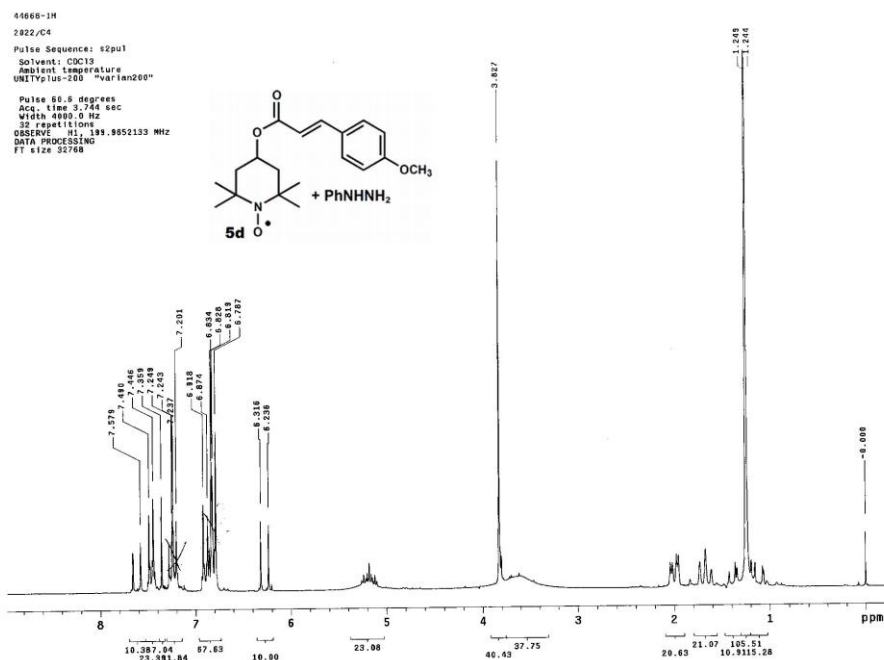

Fig. S18. 2,2,6,6-Tetramethyl-1-oxyl-4-piperidyl 3-*E*-(4-methoxyphenyl)acrylate (**5d**) + C<sub>6</sub>H<sub>5</sub>NHNH<sub>2</sub>, <sup>1</sup>H NMR

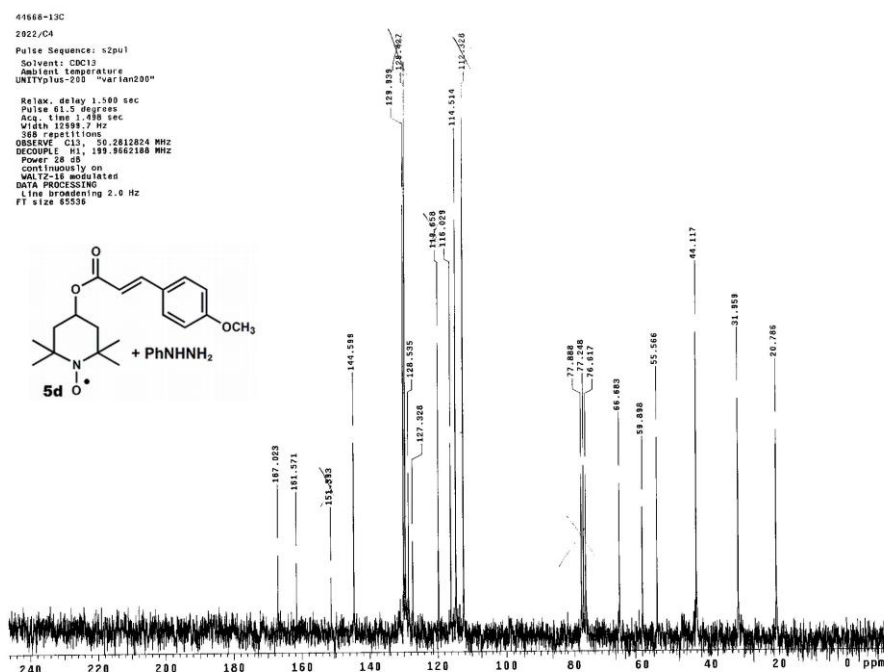

Fig. S19. 2,2,6,6-Tetramethyl-1-oxyl-4-piperidyl 3-*E*-(4-methoxyphenyl)acrylate (**5d**) + C<sub>6</sub>H<sub>5</sub>NHNH<sub>2</sub>, <sup>13</sup>C NMR

File : C:\msdchem\1\data\lpic2012\BSUJ\_2022\_C4.D  
 Operator : A Kielczewska  
 Acquired : 27 Jul 2012 12:22 using AcqMethod DI250.m  
 Instrument : SIS\_DIP-5975B  
 Sample Name: 2022\_C4  
 Misc Info :  
 Vial Number: 1

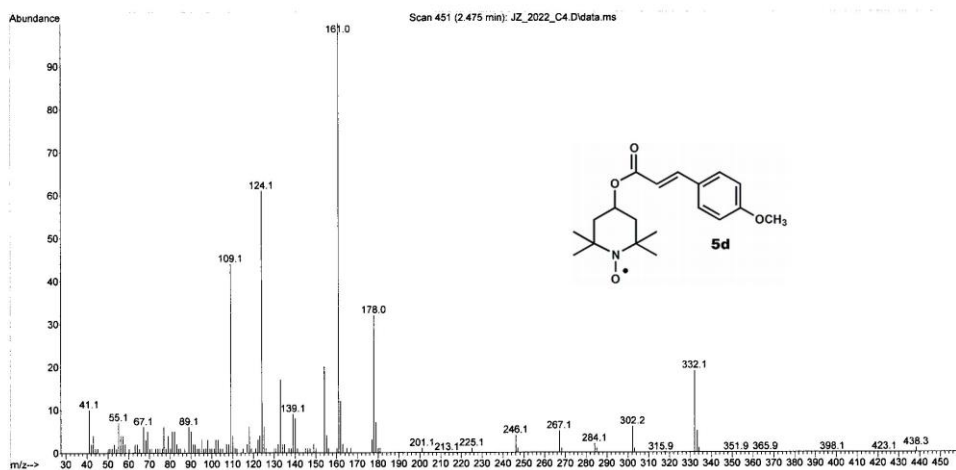

Fig. S20. 2,2,6,6-Tetramethyl-1-oxyl-4-piperidyl 3-*E*-(4-methoxyphenyl)acrylate (**5d**), EI MS

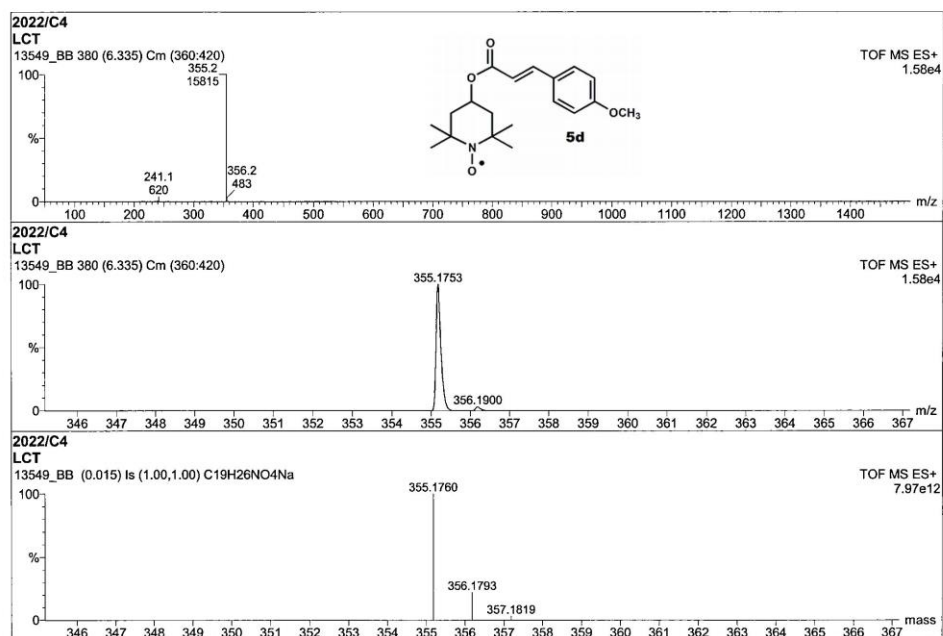

Fig. S21. 2,2,6,6-Tetramethyl-1-oxyl-4-piperidyl 3-*E*-(4-methoxyphenyl)acrylate (**5d**), ESI MS

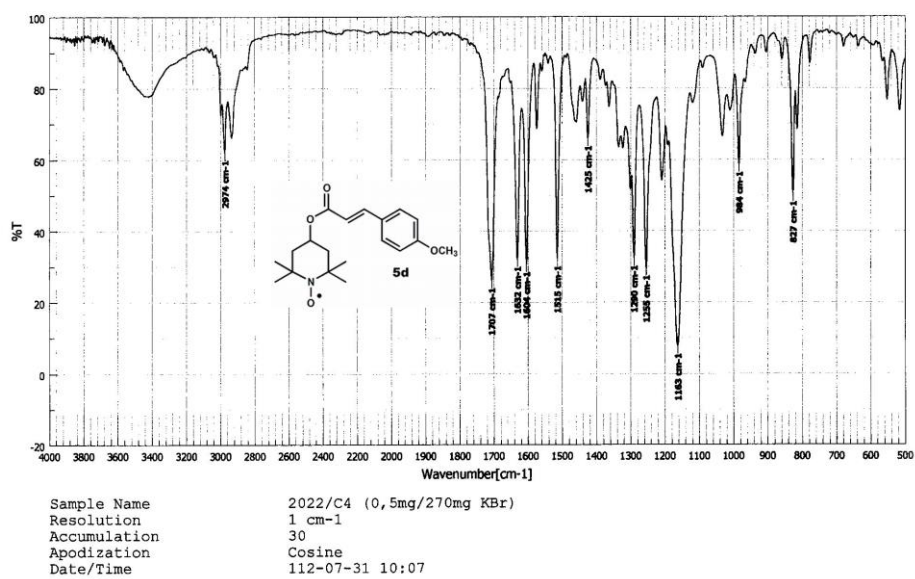

Fig. S22. 2,2,6,6-Tetramethyl-1-oxyl-4-piperidyl 3-*E*-(4-methoxyphenyl)acrylate (**5d**), IR

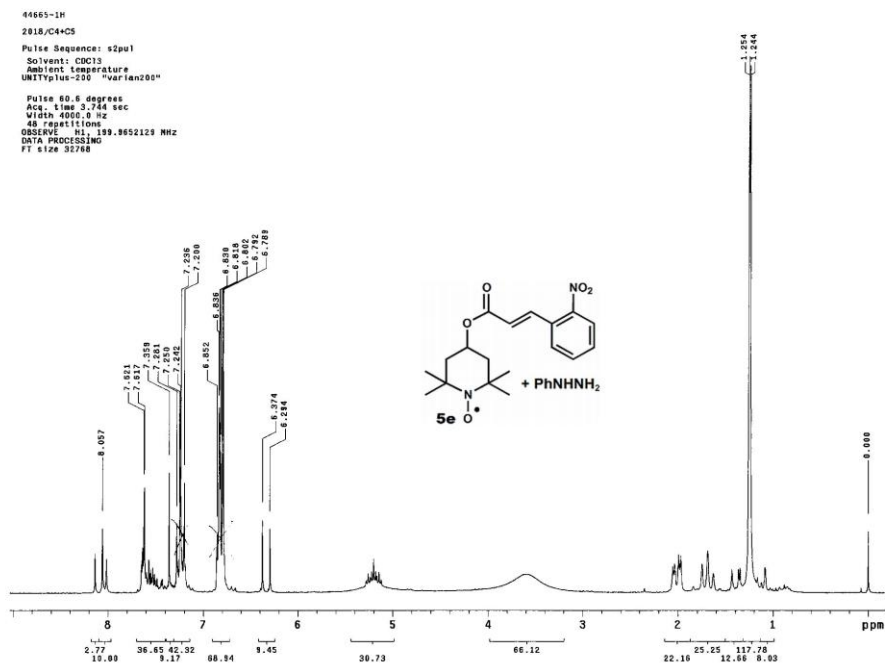

Fig. S23. 2,2,6,6-Tetramethyl-1-oxyl-4-piperidyl 3-*E*-(2-nitrophenyl)acrylate (**5e**) + C<sub>6</sub>H<sub>5</sub>NHNH<sub>2</sub>, <sup>1</sup>H NMR

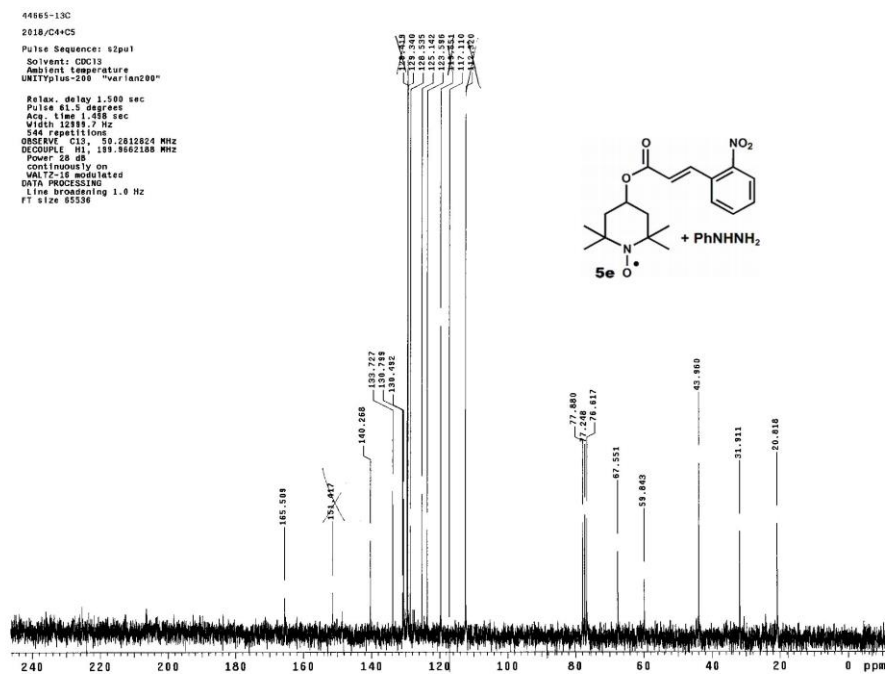

Fig. S24. 2,2,6,6-Tetramethyl-1-oxyl-4-piperidyl 3-*E*-(2-nitrophenyl)acrylate (**5e**) + C<sub>6</sub>H<sub>5</sub>NHNH<sub>2</sub>, <sup>13</sup>C NMR

File : C:\msdchem\1\data\lpic2012\BS\JZ\_218\_C5.D  
 Operator : A Kielczewska  
 Acquired : 27 Jul 2012 10:42 using AcqMethod DI250.m  
 Instrument : SIS\_DIP-5975B  
 Sample Name: 218\_C5  
 Misc Info :  
 Vial Number: 1

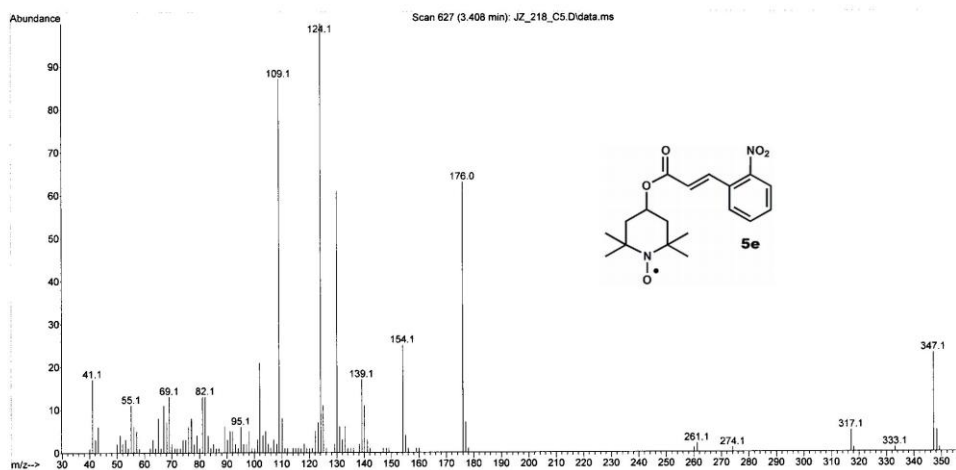

Fig. S25. 2,2,6,6-Tetramethyl-1-oxyl-4-piperidyl 3-*E*-(2-nitrophenyl)acrylate (**5e**), EI MS

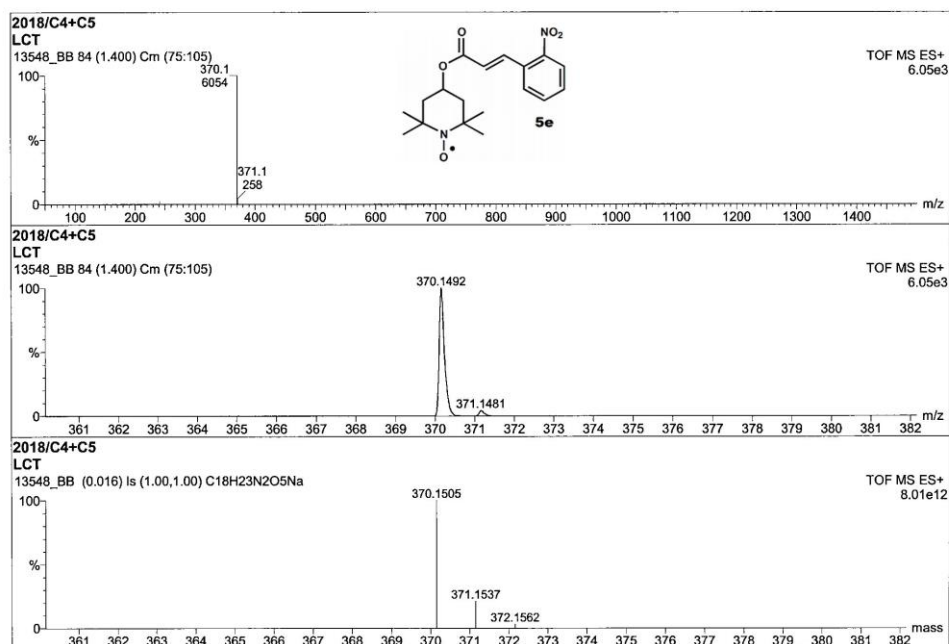

Fig. S26. 2,2,6,6-Tetramethyl-1-oxyl-4-piperidyl 3-*E*-(2-nitrophenyl)acrylate (**5e**), ESI MS

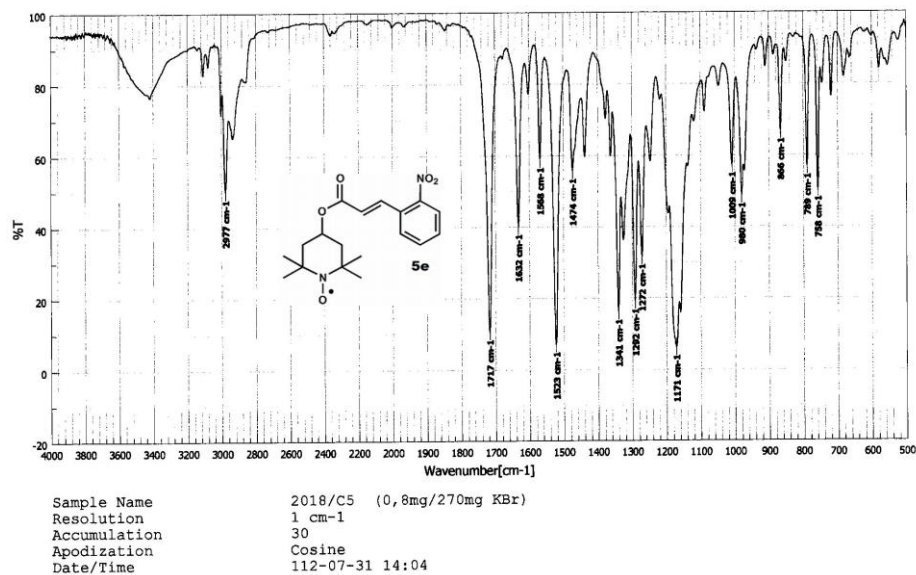

Fig. S27. 2,2,6,6-Tetramethyl-1-oxyl-4-piperidyl 3-E-(2-nitrophenyl)acrylate (**5e**), IR



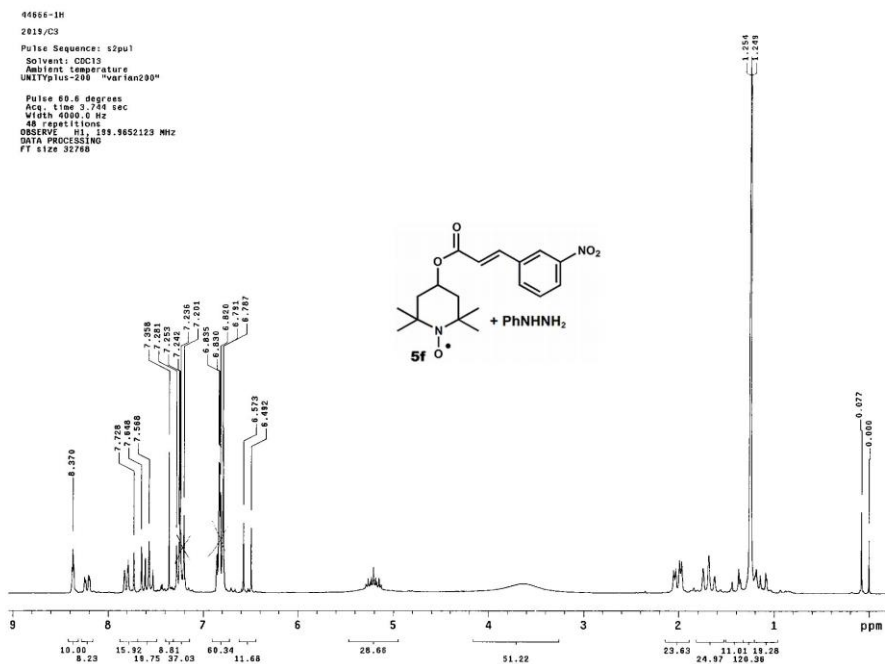

Fig. S28. 2,2,6,6-Tetramethyl-1-oxyl-4-piperidyl 3-*E*-(3-nitrophenyl)acrylate (**5f**) + C<sub>6</sub>H<sub>5</sub>NHNH<sub>2</sub>, <sup>1</sup>H NMR

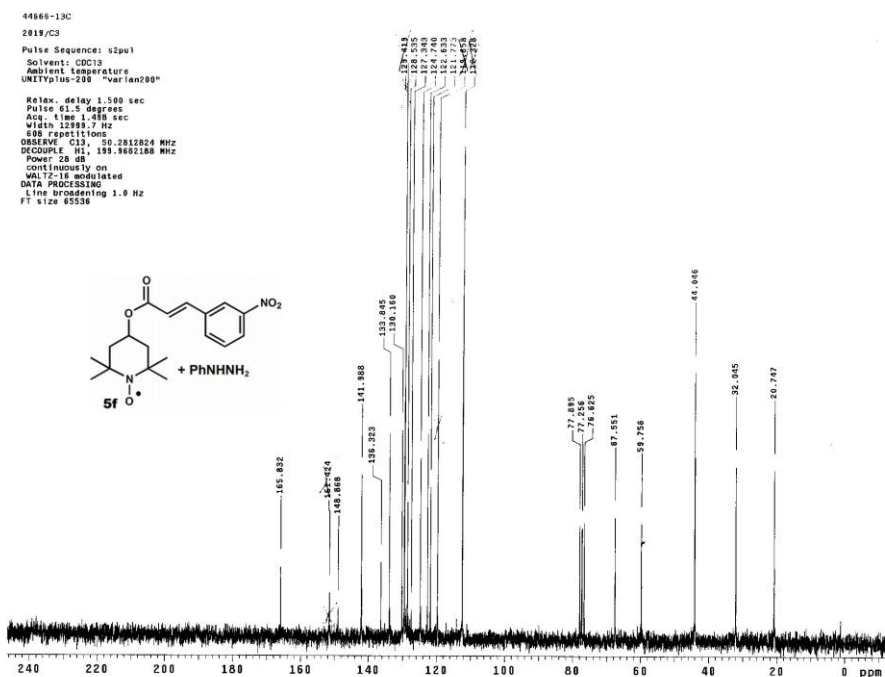

Fig. S29. 2,2,6,6-Tetramethyl-1-oxyl-4-piperidyl 3-*E*-(3-nitrophenyl)acrylate (**5f**) + C<sub>6</sub>H<sub>5</sub>NHNH<sub>2</sub>, <sup>13</sup>C NMR

File : C:\MSDCHEM1\DATA\PIEC2012\BS\Snapshot\JZ\_2019\_C3.D  
 Operator : A Kelczewska  
 Acquired : 6 Jul 2012 15:09 using AcqMethod DI250.m  
 Instrument : SIS\_DIP-5975B  
 Sample Name: 2019/C3  
 Misc Info :  
 Vial Number: 1

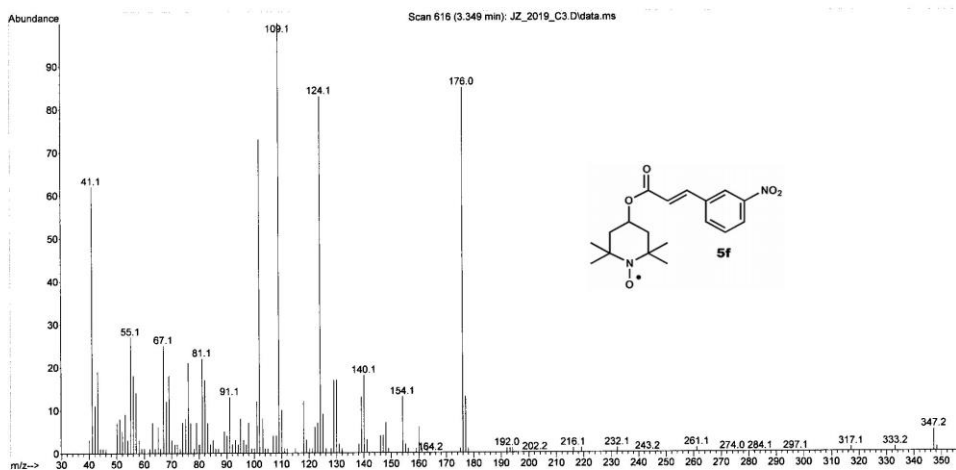

Fig. S30. 2,2,6,6-Tetramethyl-1-oxyl-4-piperidyl 3-*E*-(3-nitrophenyl)acrylate (**5f**), EI MS

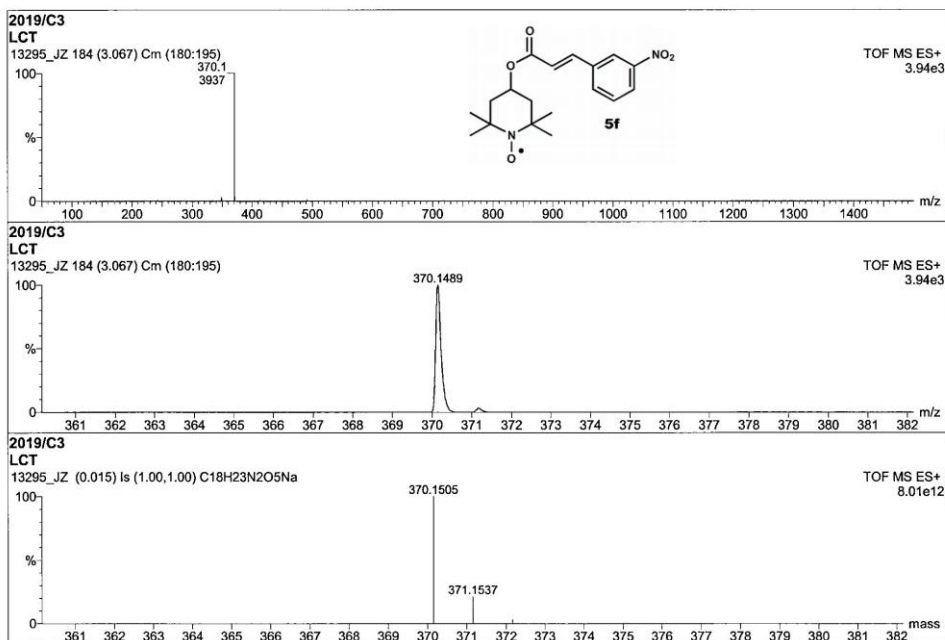

Fig. S31. 2,2,6,6-Tetramethyl-1-oxyl-4-piperidyl 3-*E*-(3-nitrophenyl)acrylate (**5f**), ESI MS

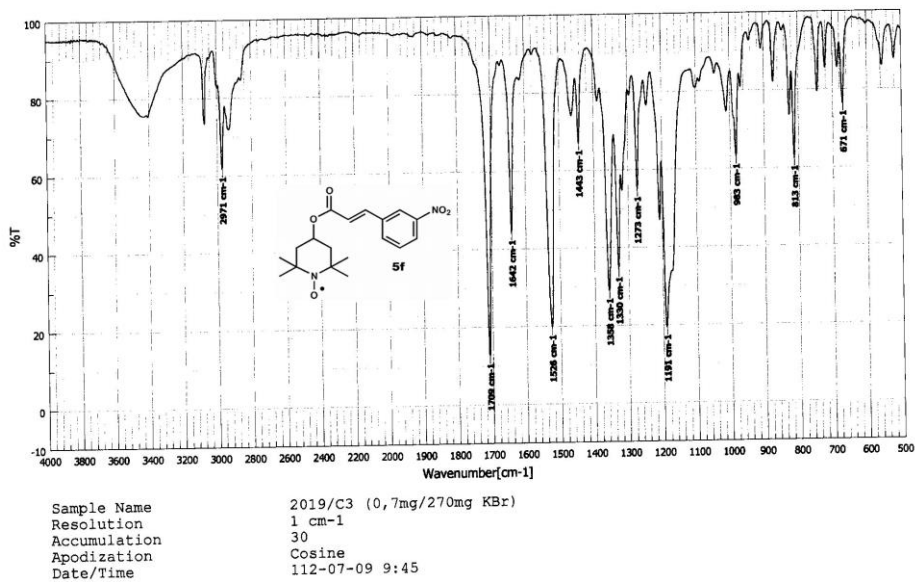

Fig. S32. 2,2,6,6-Tetramethyl-1-oxyl-4-piperidyl 3-E-(3-nitrophenyl)acrylate (**5f**), IR

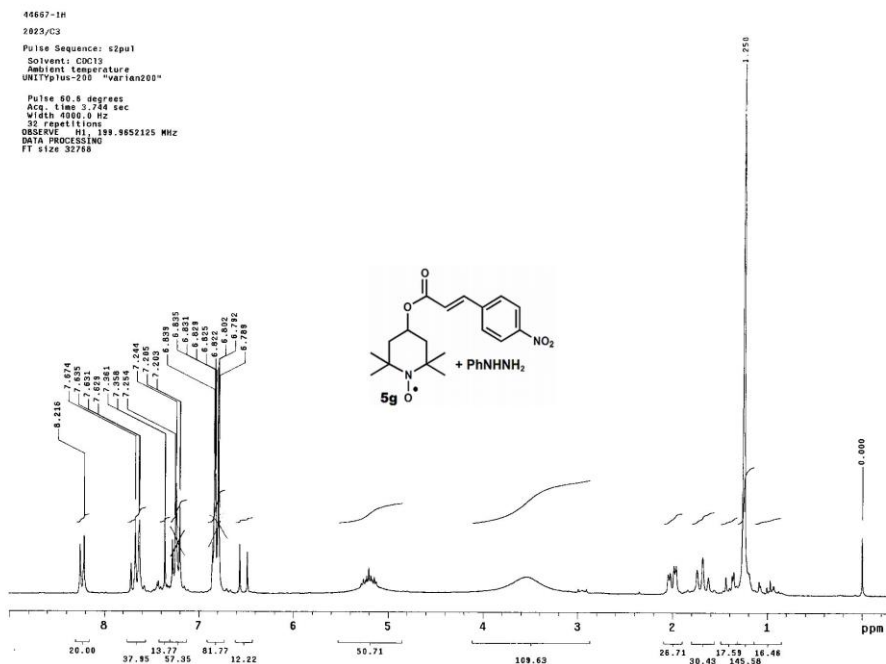

Fig. S33. 2,2,6,6-Tetramethyl-1-oxyl-4-piperidyl 3-*E*-(4-nitrophenyl)acrylate (**5g**) + C<sub>6</sub>H<sub>5</sub>NHNH<sub>2</sub>, <sup>1</sup>H NMR

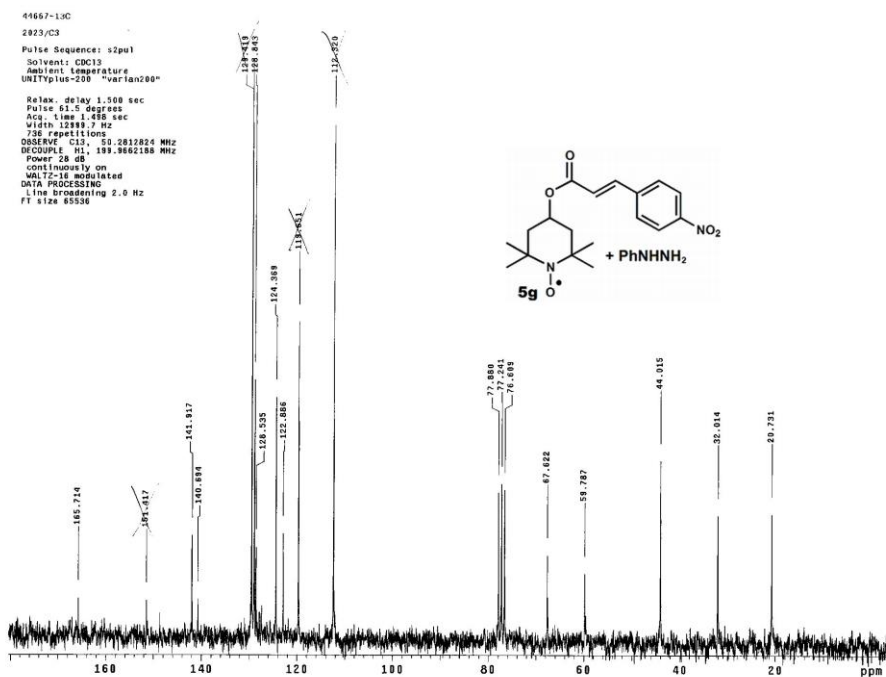

Fig. S34. 2,2,6,6-Tetramethyl-1-oxyl-4-piperidyl 3-*E*-(4-nitrophenyl)acrylate (**5g**) + C<sub>6</sub>H<sub>5</sub>NHNH<sub>2</sub>, <sup>13</sup>C NMR

File :C:\msdchem\1\data\lipiec2012\BS\JZ\_2023\_C5.D  
 Operator : A Kielczewska  
 Acquired : 27 Jul 2012 12:39 using AcqMethod D1250.m  
 Instrument : SIS\_DIP-5975B  
 Sample Name: 2023\_C5  
 Misc Info :  
 Vial Number: 1

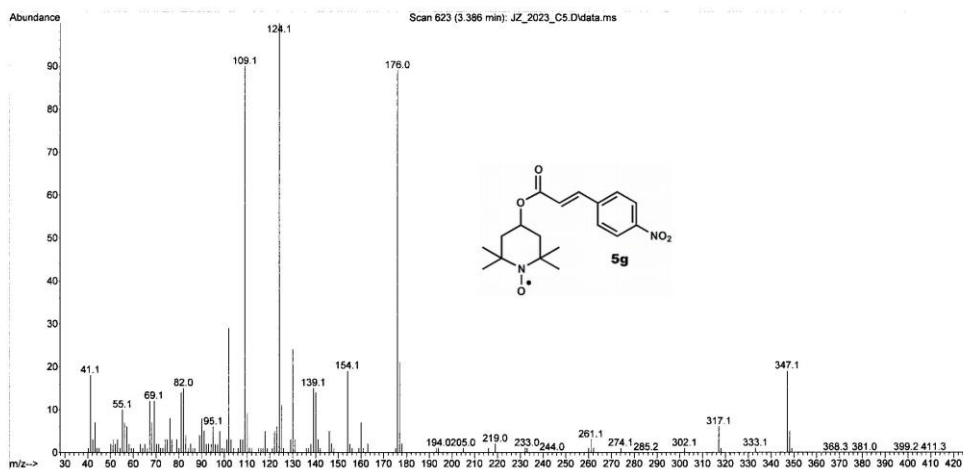

Fig. S35. 2,2,6,6-Tetramethyl-1-oxyl-4-piperidyl 3-*E*-(4-nitrophenyl)acrylate (**5g**), EI MS

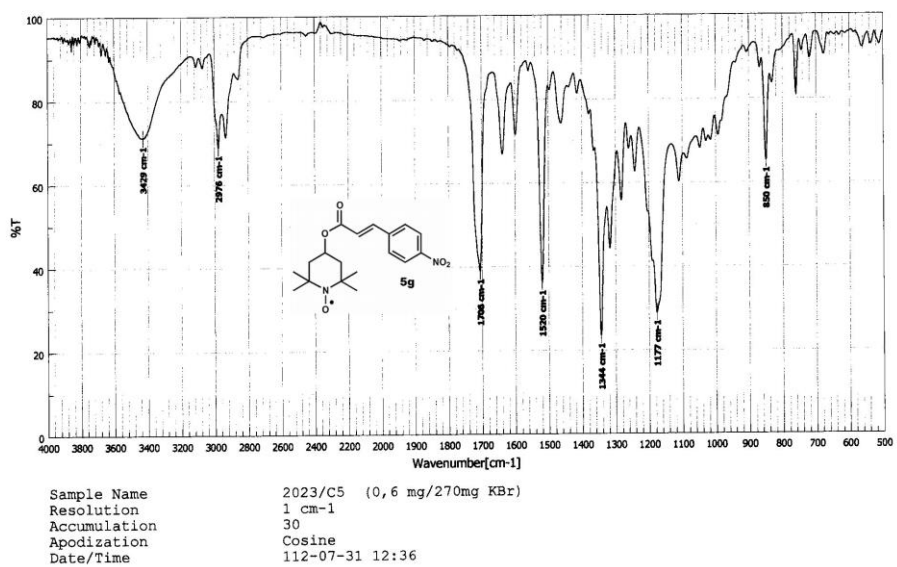

Fig. S36. 2,2,6,6-Tetramethyl-1-oxyl-4-piperidyl 3-*E*-(4-nitrophenyl)acrylate (**5g**), IR

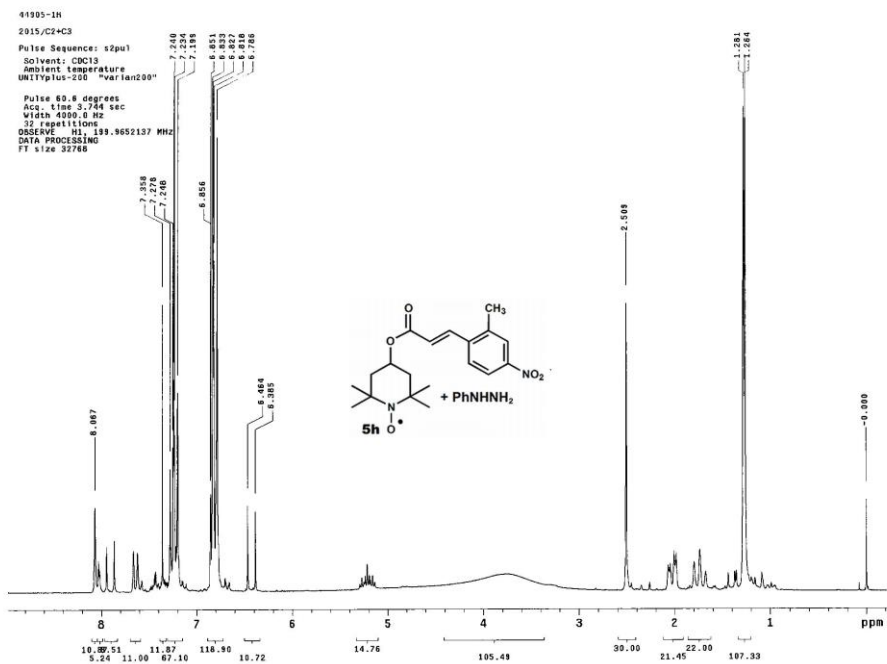

Fig. S37. 2,2,6,6-Tetramethyl-1-oxyl-4-piperidyl  
3-*E*-(2-methyl-4-nitrophenyl)acrylate (**5h**) + C<sub>6</sub>H<sub>5</sub>NHNH<sub>2</sub>, <sup>1</sup>H NMR

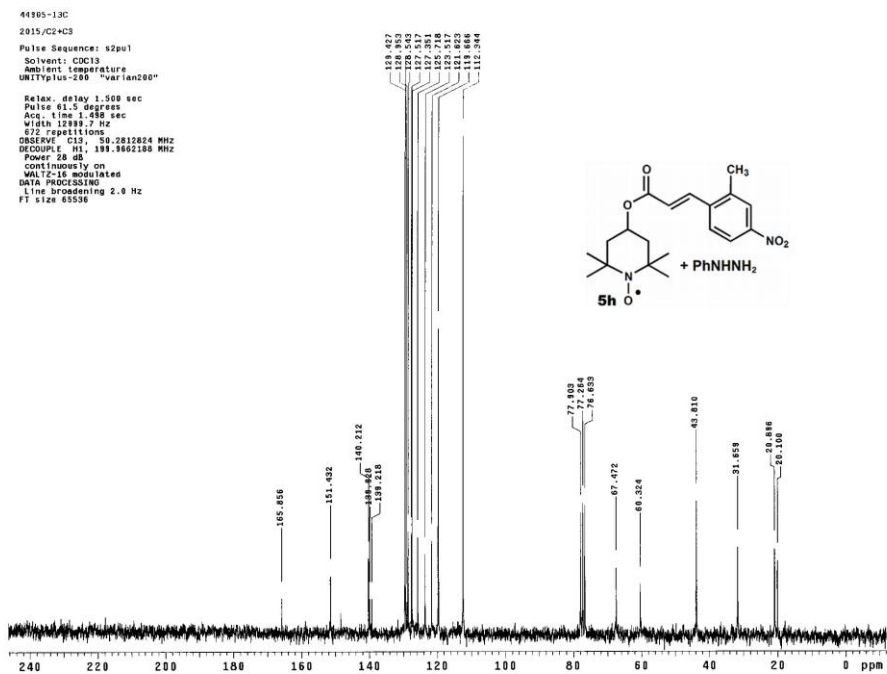

Fig. S38. 2,2,6,6-Tetramethyl-1-oxyl-4-piperidyl  
3-*E*-(2-methyl-4-nitrophenyl)acrylate (**5h**) + C<sub>6</sub>H<sub>5</sub>NHNH<sub>2</sub>, <sup>13</sup>C NMR

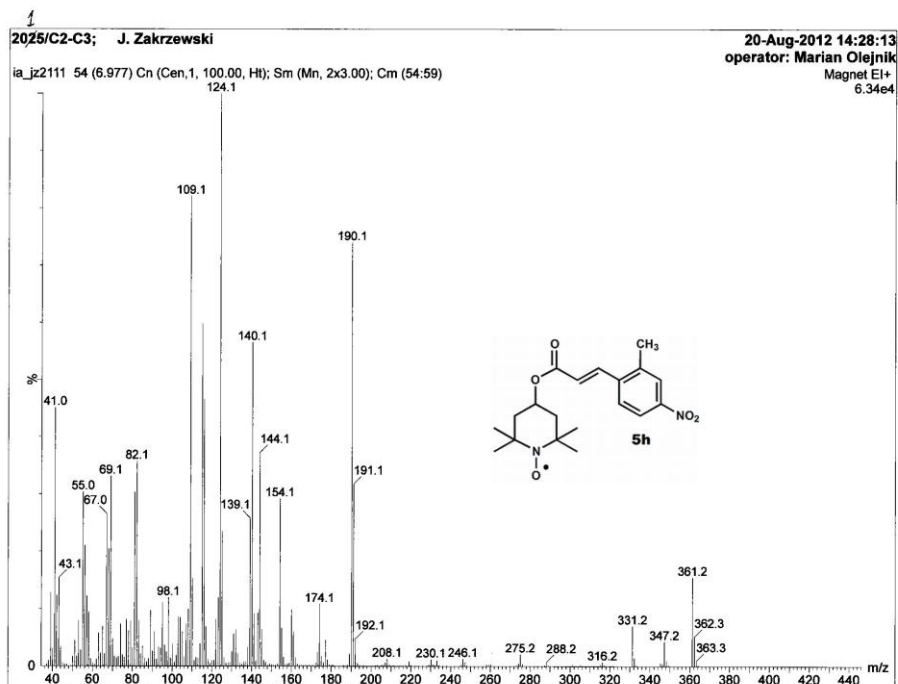

Fig. S39. 2,2,6,6-Tetramethyl-1-oxyl-4-piperidyl  
 3-*E*-(2-methyl-4-nitrophenyl)acrylate (**5h**), EI MS

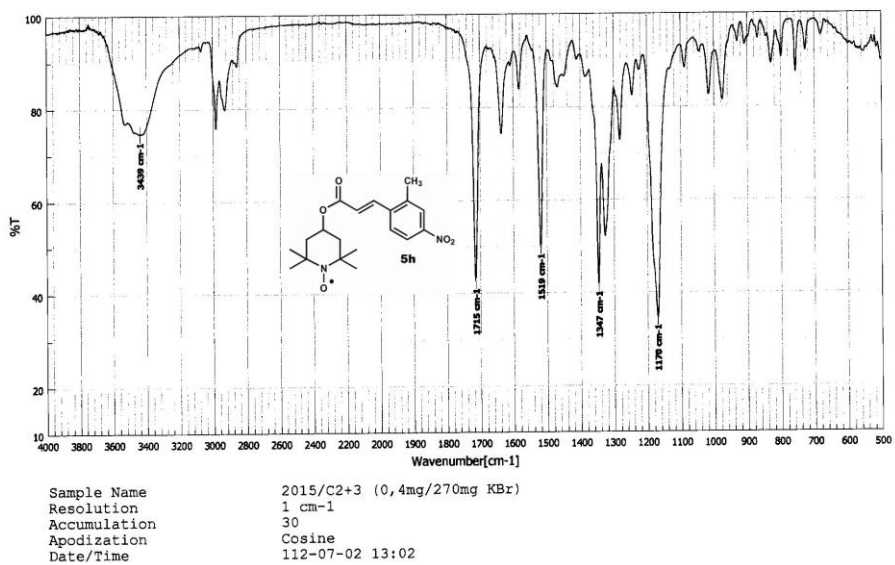

Fig. S40. 2,2,6,6-Tetramethyl-1-oxyl-4-piperidyl  
 3-*E*-(2-methyl-4-nitrophenyl)acrylate (**5h**), IR

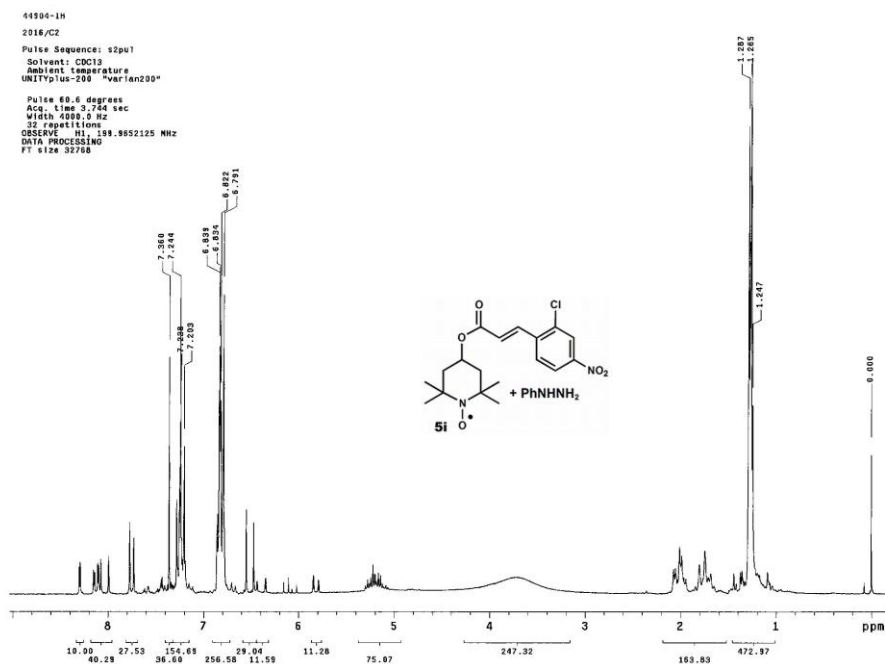

Fig. S41. 2,2,6,6-Tetramethyl-1-oxyl-4-piperidyl  
3-*E*-(2-chloro-4-nitrophenyl)acrylate (**5i**) + C<sub>6</sub>H<sub>5</sub>NHNH<sub>2</sub>, <sup>1</sup>H NMR

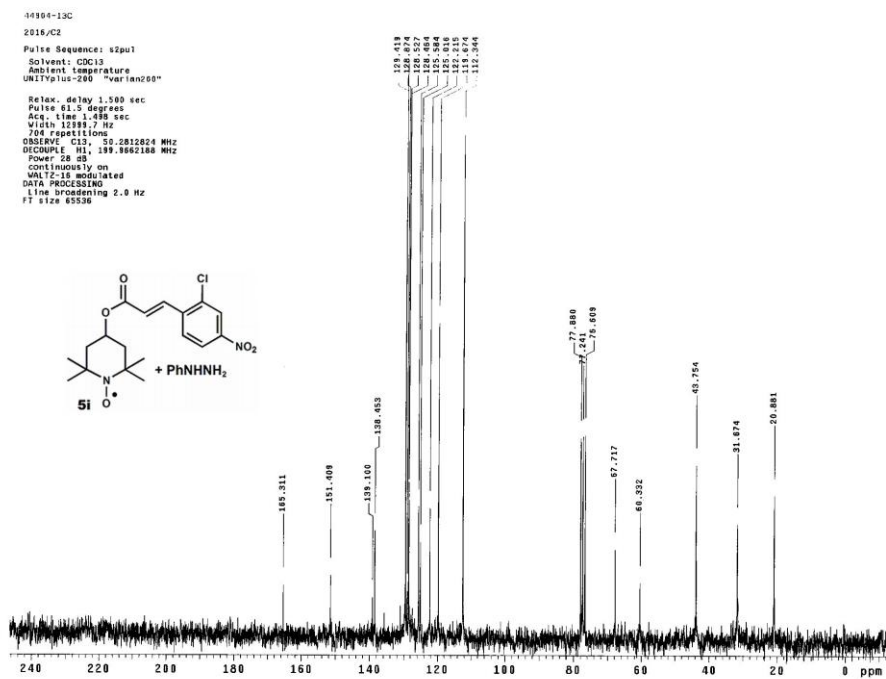

Fig. S42. 2,2,6,6-Tetramethyl-1-oxyl-4-piperidyl  
3-*E*-(2-chloro-4-nitrophenyl)acrylate (**5i**) + C<sub>6</sub>H<sub>5</sub>NHNH<sub>2</sub>, <sup>13</sup>C NMR



File :C:\msdchem\1\data\ipiec2012\BA\JZ\_2016\_C2.D  
 Operator : A Kelczewska  
 Acquired : 6 Jul 2012 11:07 using AcqMethod DI250.m  
 Instrument : SIS\_DIP-5975B  
 Sample Name: 2016/C2  
 Misc Info :  
 Vial Number: 1

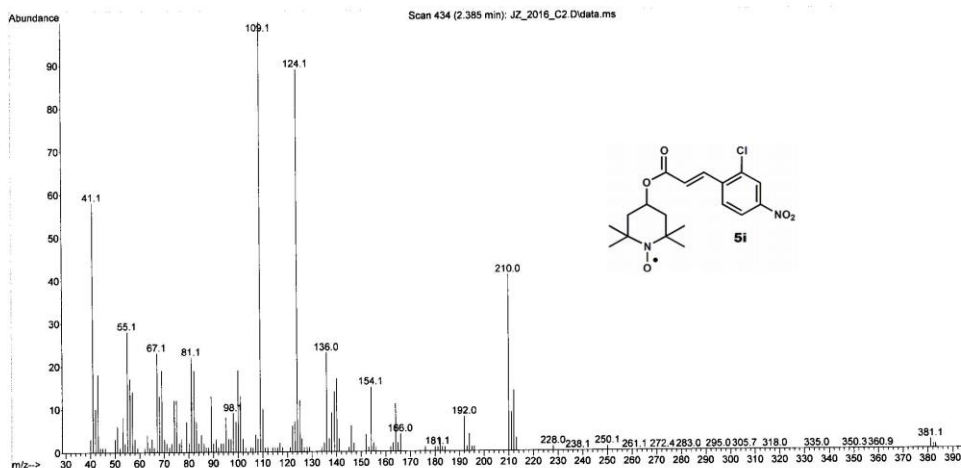

Fig. S43. 2,2,6,6-Tetramethyl-1-oxyl-4-piperidyl  
 3-*E*-(2-chloro-4-nitrophenyl)acrylate (**5i**), EI MS

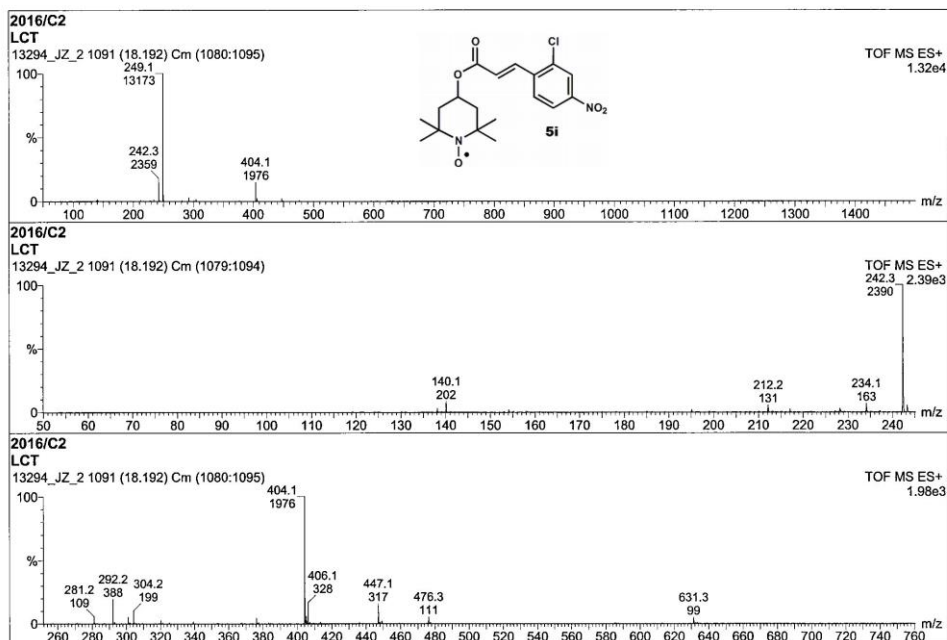

Fig. S44. 2,2,6,6-Tetramethyl-1-oxyl-4-piperidyl  
 3-*E*-(2-chloro-4-nitrophenyl)acrylate (**5i**), ESI MS

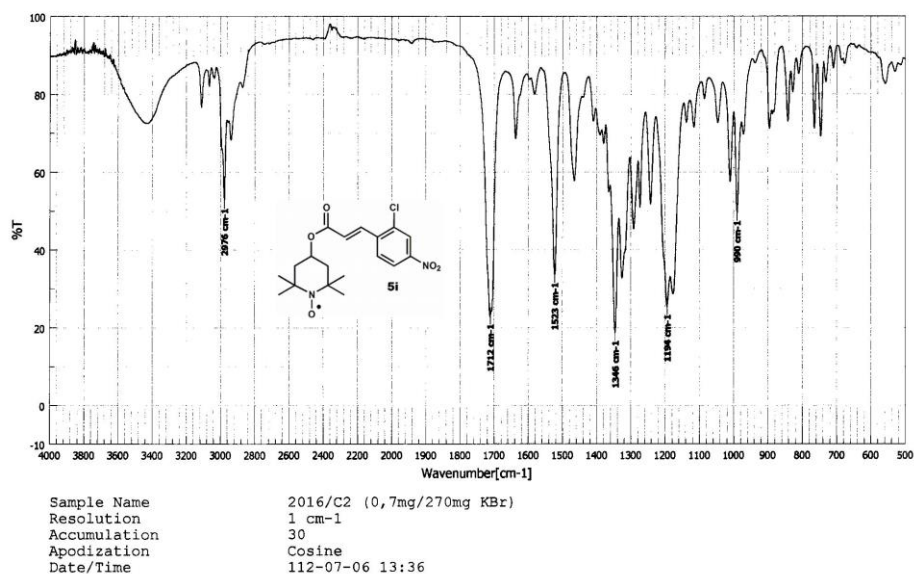

Fig. S45. 2,2,6,6-Tetramethyl-1-oxyl-4-piperidyl  
 3-*E*-(2-chloro-4-nitrophenyl)acrylate (**5i**), IR
